# Supplementary material for: Choline Deficiency Causes Colonic Type II Natural Killer T (NKT) Cell Loss and Alleviates Murine Colitis under Type I NKT Cell Deficiency
Source: PubMed Central journal article supplement (PMC5241147; doi:10.1371/journal.pone.0169681), 2017-01-17
Supplement: pone.0169681.s001.pdf [file pone.0169681.s001.pdf]

# S1 Table

| <b>Gene</b>          | <b>bp</b> | <b>Forward primer</b>   | <b>Reverse primer</b>     |
|----------------------|-----------|-------------------------|---------------------------|
| <b><i>Cxcl16</i></b> | 147       | TGAACTAGTGGACTGCTTTGAGC | GCAAATGTTTTTGGTGGTGA      |
| <b><i>Cxcr6</i></b>  | 490       | TACGATGGGCACTACGAGGGAG  | GCAAAGAAACCAACAGGGAGACCAC |
| <b><i>Ep1</i></b>    | 666       | TTAACCTGAGCCTAGCGGAT    | CGCTGAGCGTATTGCACACTA     |
| <b><i>Ep2</i></b>    | 536       | GTGGCCCTGGCTCCCGAAAGTC  | GGCAAGGAGCATATGGCGAAGGTG  |
| <b><i>Ep3</i></b>    | 438       | CCGGGCACGTGGTGCTTCAT    | TAGCAGCAGATAAACCCAGG      |
| <b><i>Ep4</i></b>    | 424       | TTCCGCTCGTGGTGCGAGTGTC  | GAGGTGGTGTCTGCTTGGGTCAG   |
